# Supplementary material
Source: PubMed Central journal article supplement (PMC7415519)

**Fig S1**

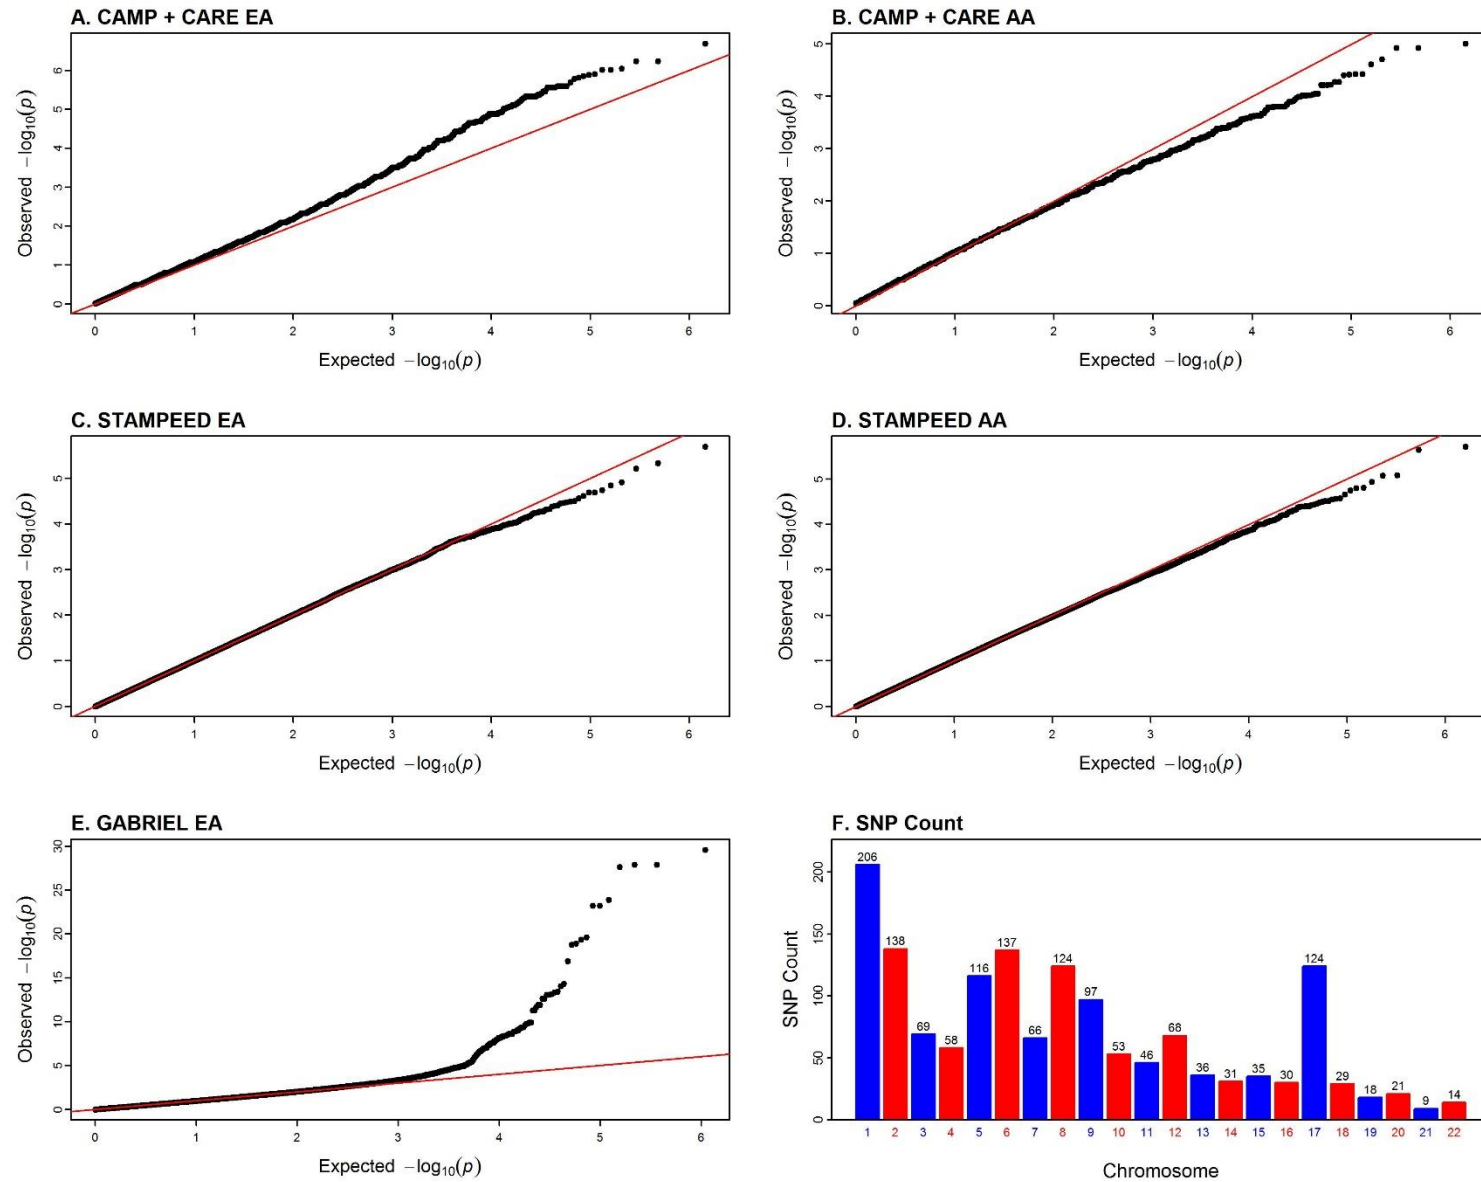

Fig S2

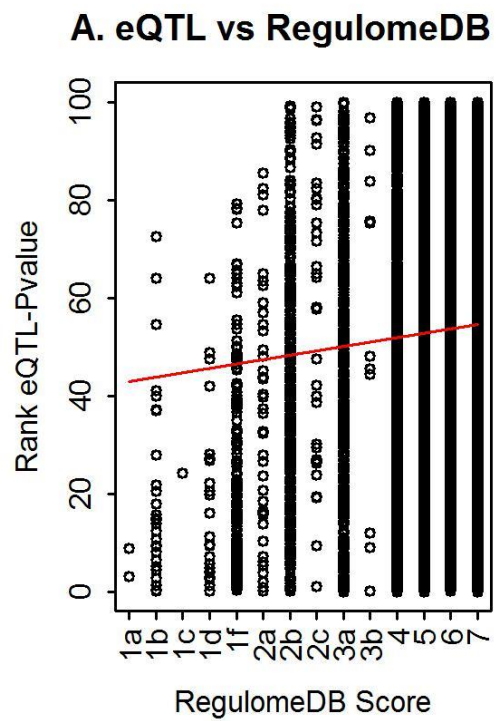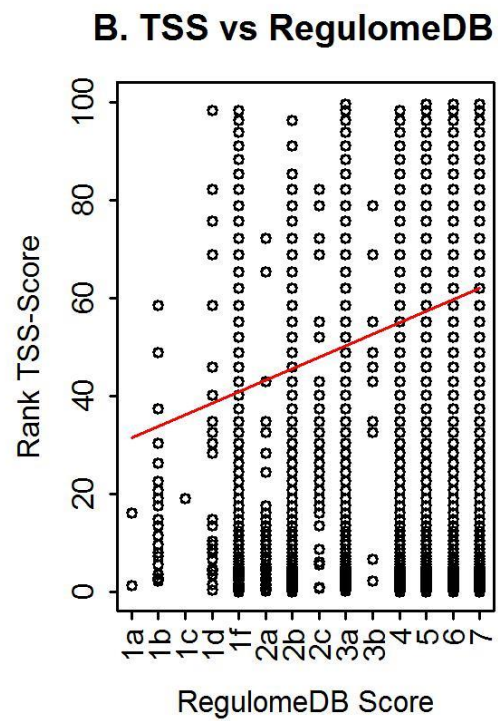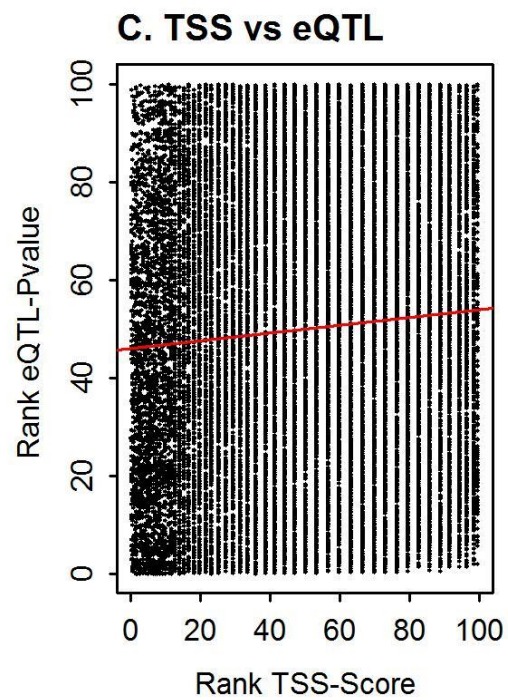

**Fig S3**

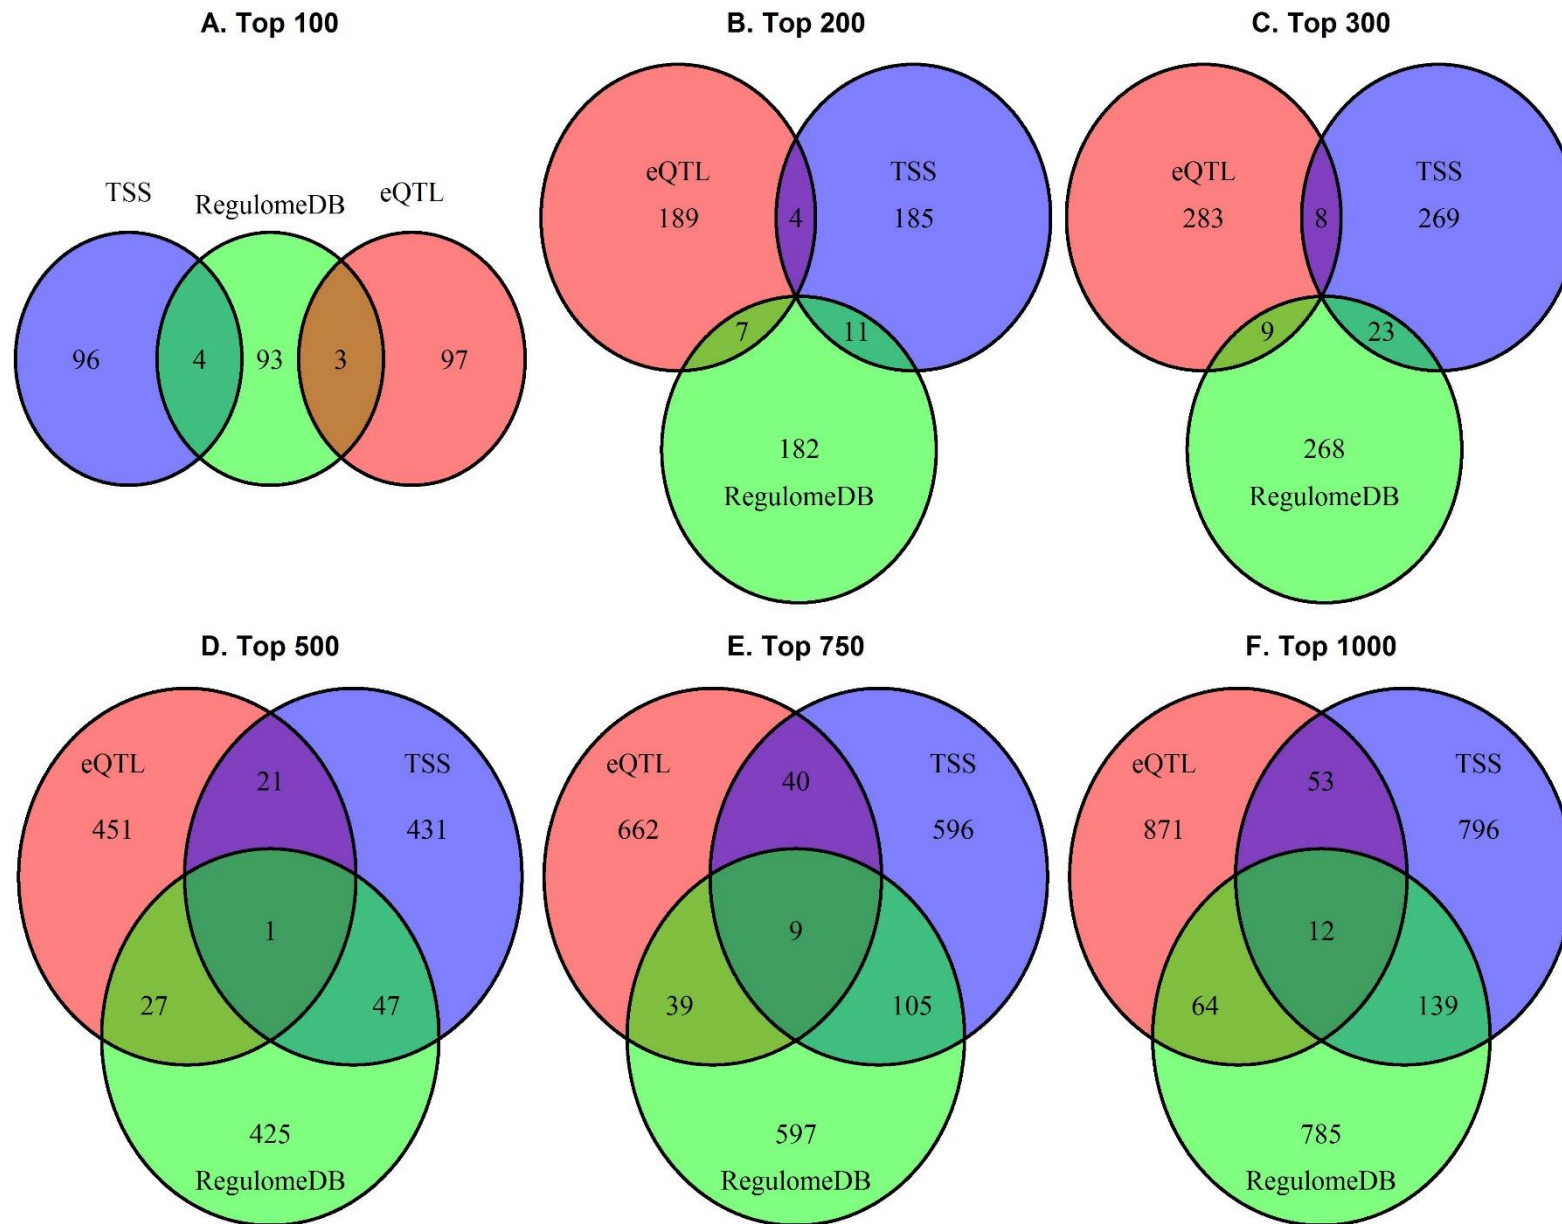

**Fig S4**

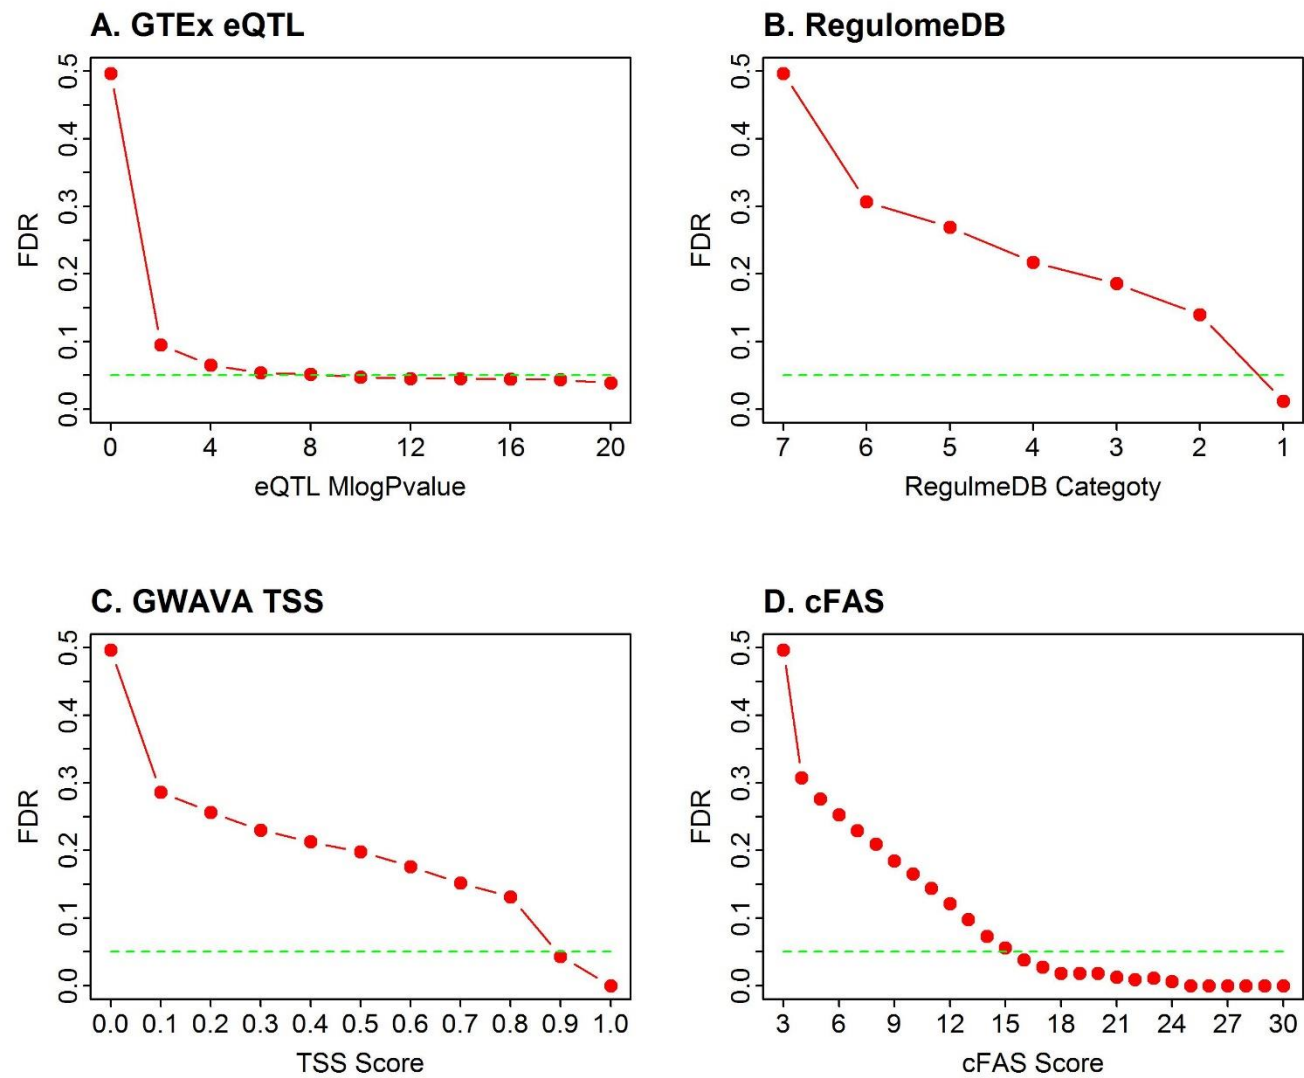





Fig S6

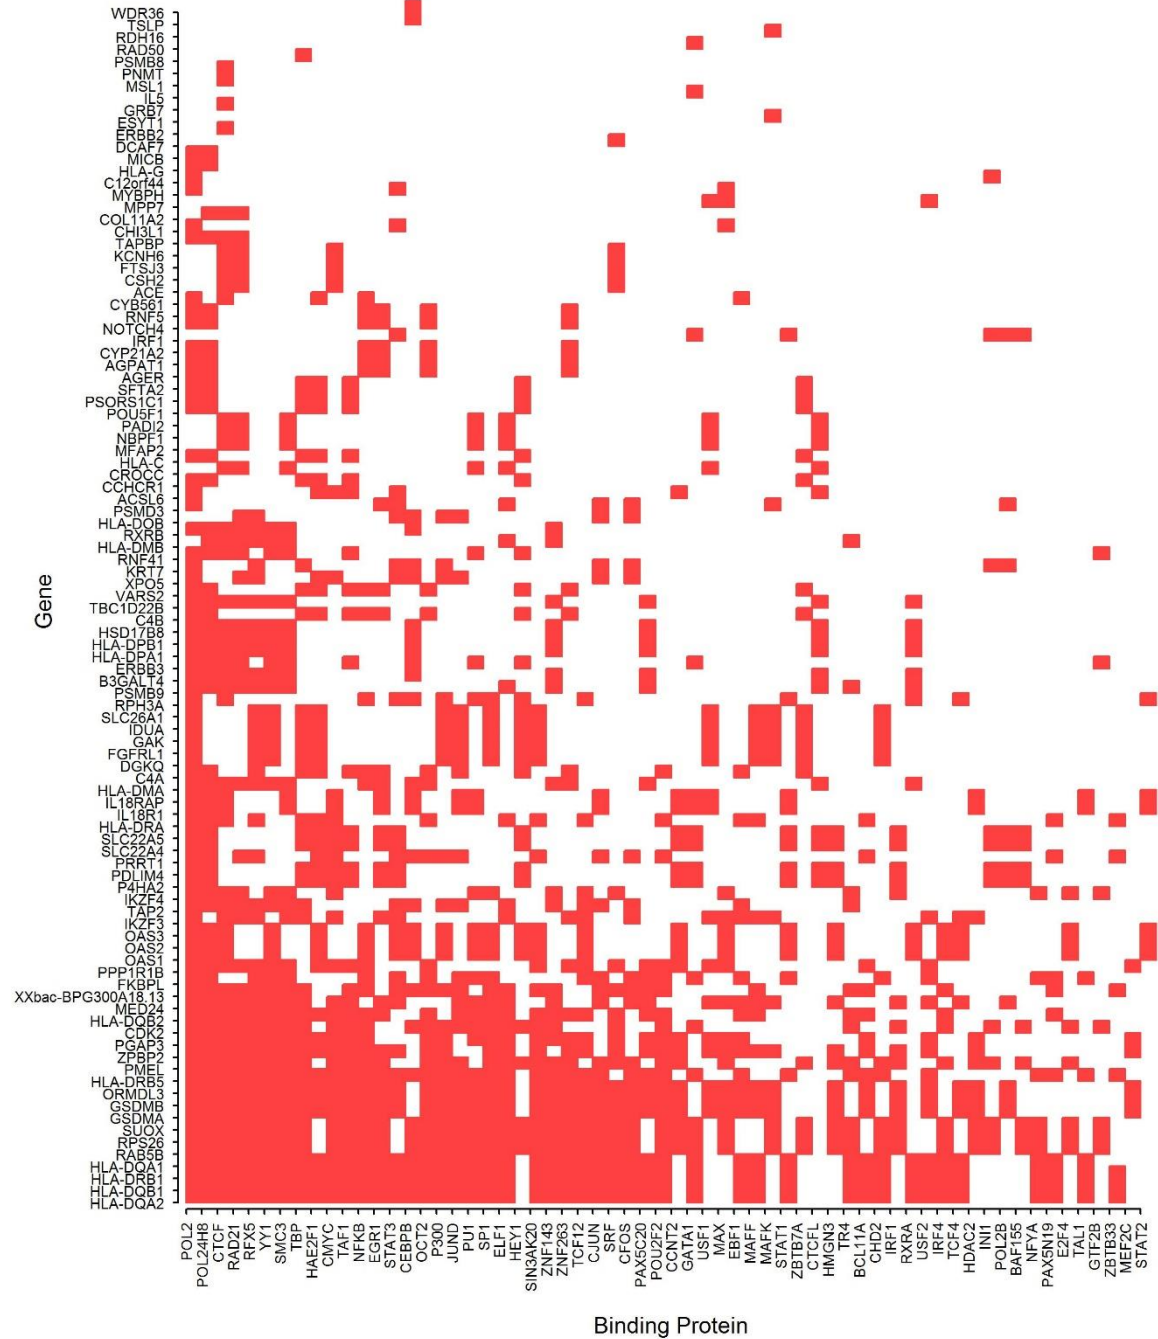

Fig S7

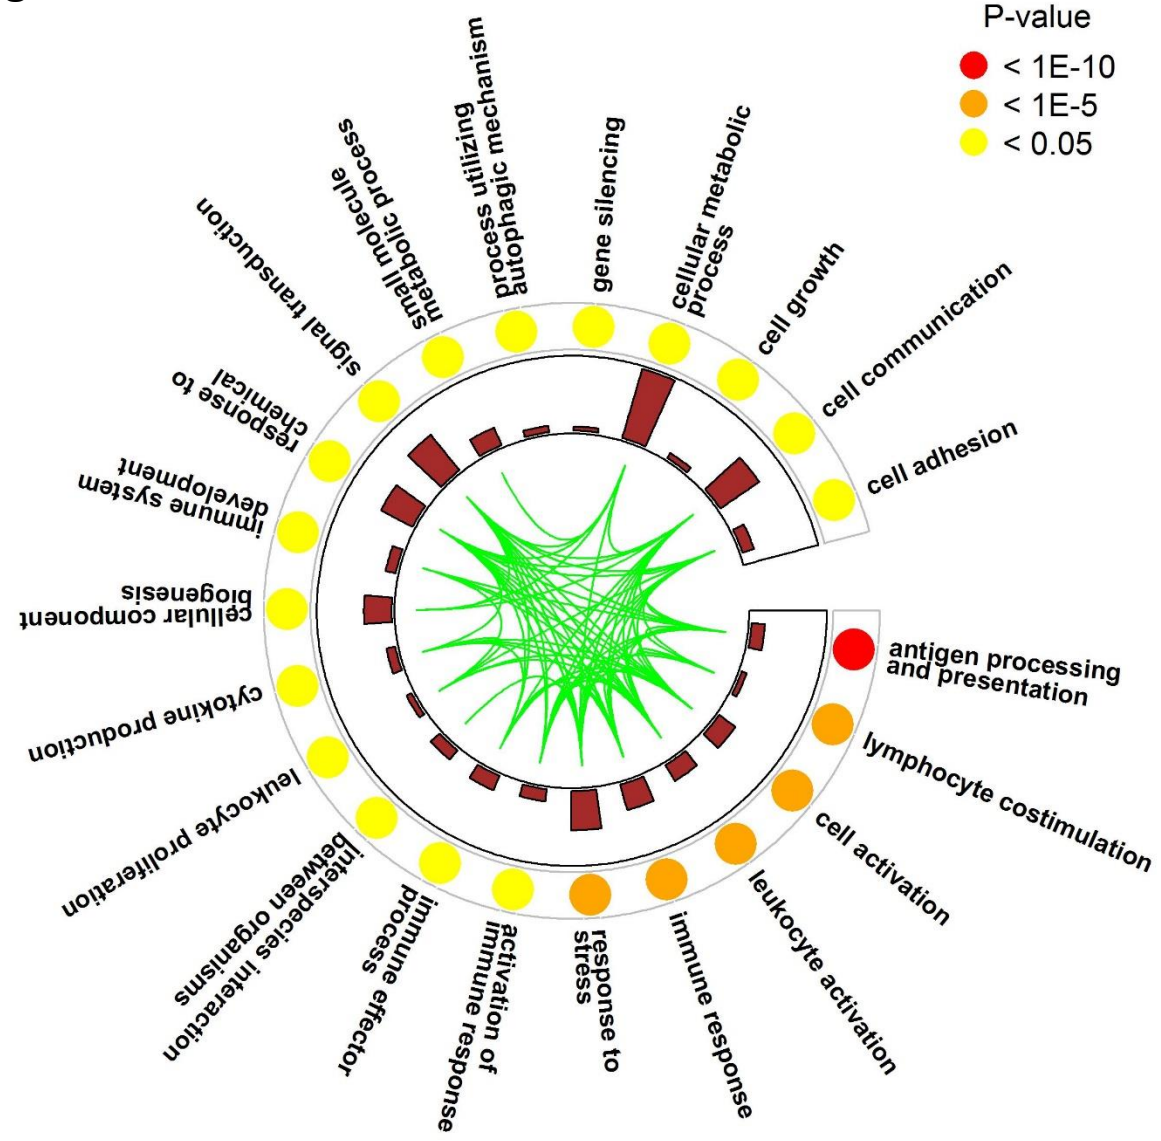

**Fig S8**

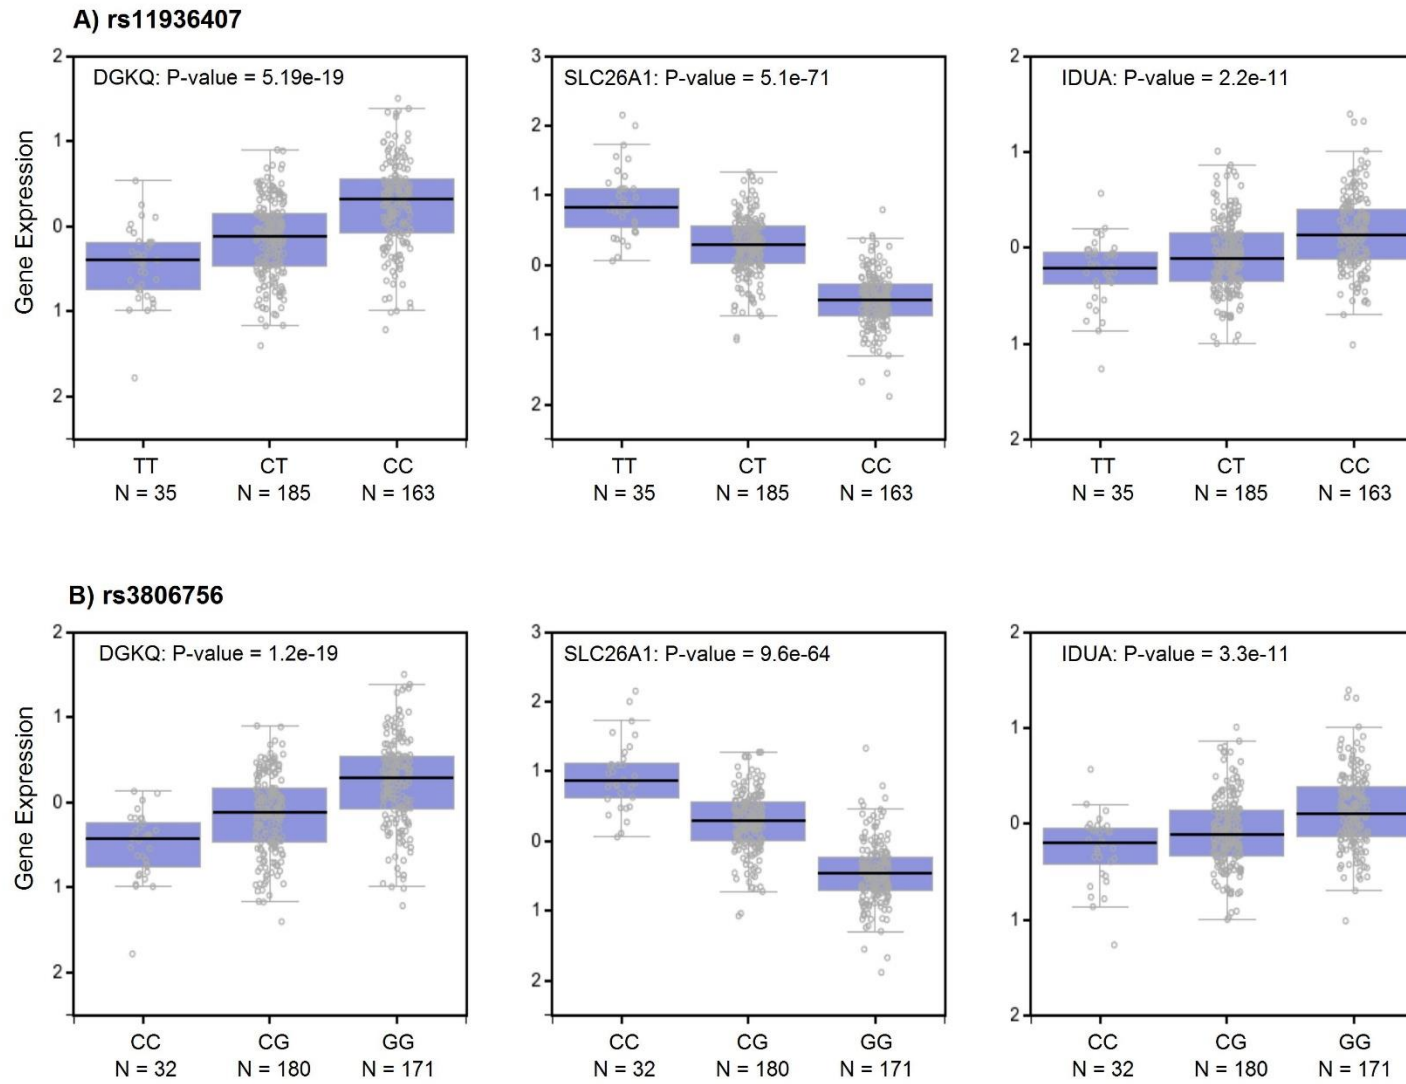



Fig S9

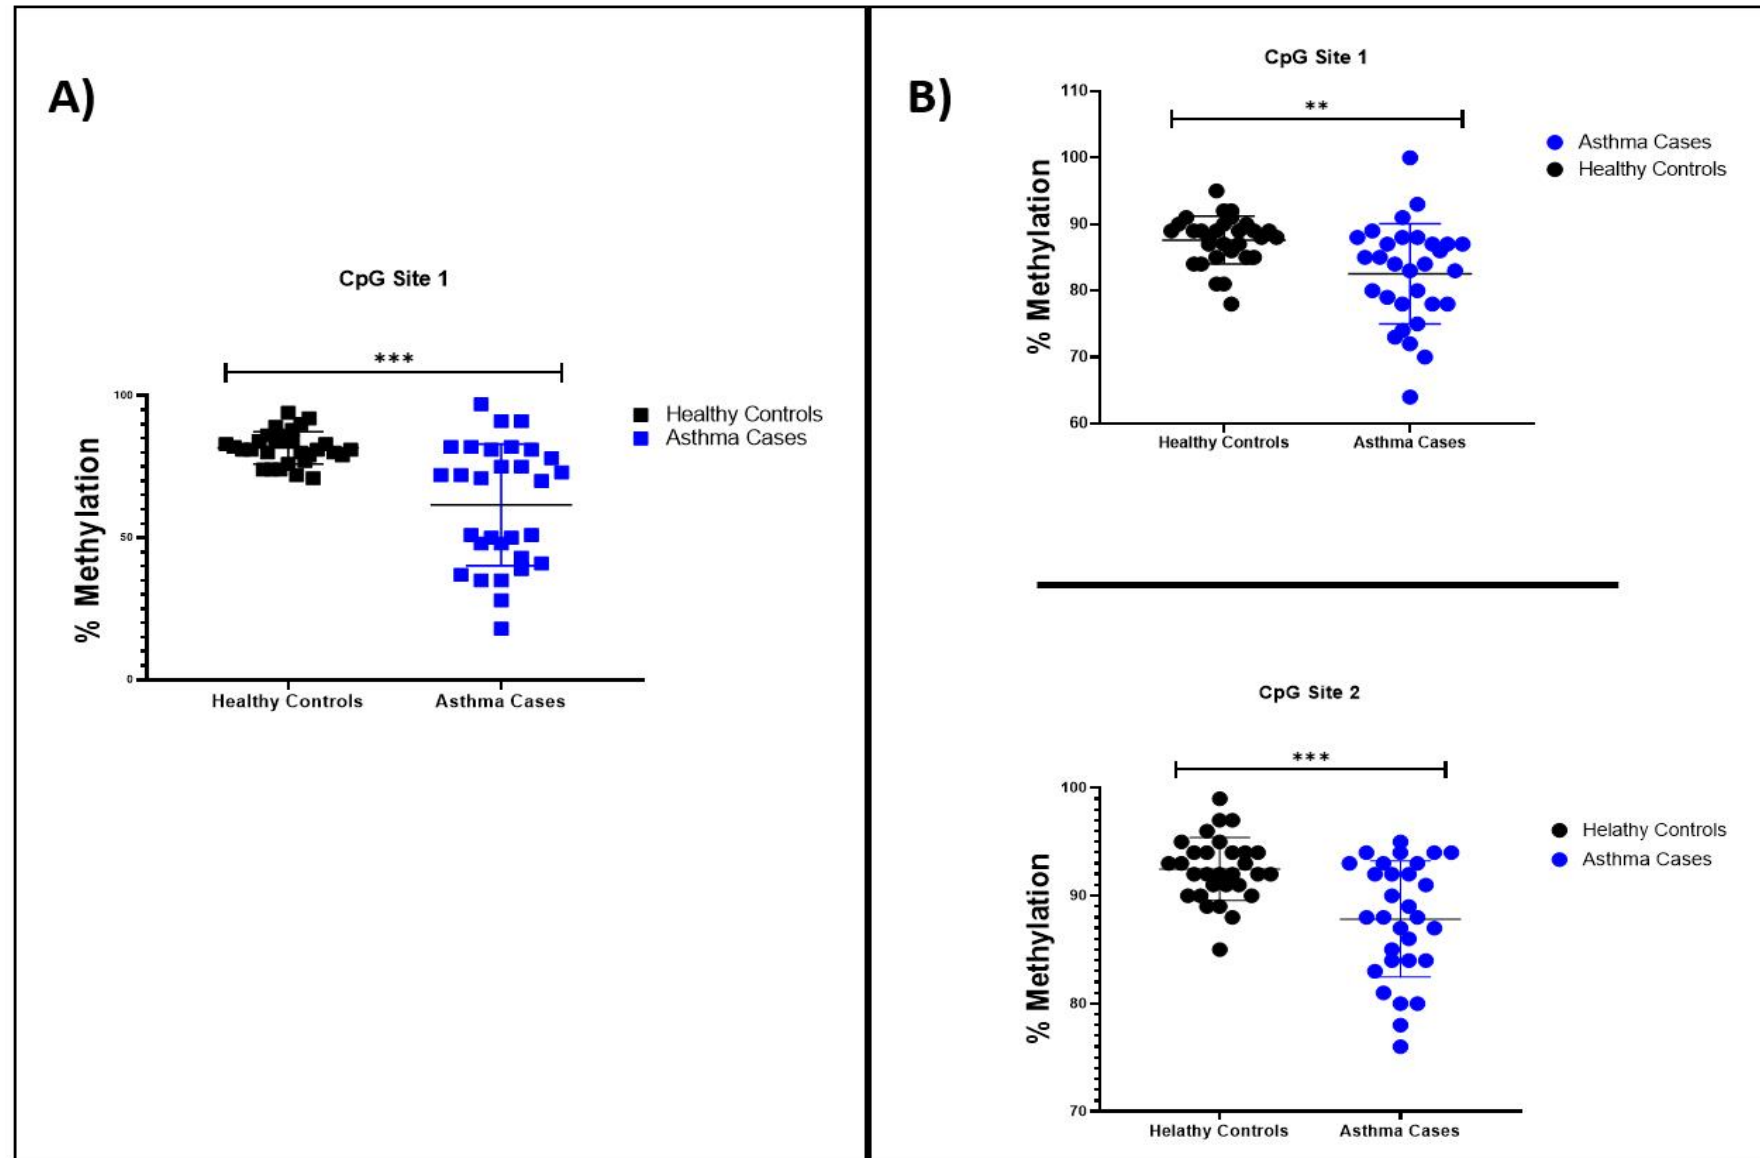

Supplement: NIHMS1590656-supplement-439_2020_2151_MOESM1_ESM.pdf [file NIHMS1590656-supplement-439_2020_2151_MOESM1_ESM.pdf]
